# Supplementary material for: Scaffold Hopping and Structural Modification of NSC 663284: Discovery of Potent (Non)Halogenated Aminobenzoquinones
Source: MDPI journal article supplement (doi:10.3390/biomedicines12010050), 2023-12-24
Supplement: s1 [file s1]

## Supplementary Material (SM)

# Scaffold Hopping and Structural Modification of NSC 663284: Discovery of Potent (Non)Halogenated Aminobenzoquinones

Nilüfer Bayrak <sup>1</sup>, Belgin Sever <sup>2,3</sup>, Halilibrahim Ciftci <sup>3,4,5</sup>, Masami Otsuka <sup>3,4</sup>, Mikako Fujita <sup>3</sup> and Amaç Fatih TuYuN <sup>1,\*</sup>

<sup>1</sup> Department of Chemistry, Faculty of Science, Istanbul University, Fatih, İstanbul 34126, Turkey; nbayrak@istanbul.edu.tr

<sup>2</sup> Department of Pharmaceutical Chemistry, Faculty of Pharmacy, Anadolu University, Eskisehir 26470, Turkey; belginsever@anadolu.edu.tr

<sup>3</sup> Medicinal and Biological Chemistry Science Farm Joint Research Laboratory, Faculty of Life Sciences, Kumamoto University, Kumamoto 862-0973, Japan; hiciftci@kumamoto-u.ac.jp (H.C.); motsuka@gpo.kumamoto-u.ac.jp (M.O.); mfujita@kumamoto-u.ac.jp (M.F.)

<sup>4</sup> Department of Drug Discovery, Science Farm Ltd., Kumamoto 862-0976, Japan

<sup>5</sup> Department of Molecular Biology and Genetics, Koc University, Istanbul 34450, Turkey

\* Correspondence: aftuyun@gmail.com or aftuyun@istanbul.edu.tr; Tel.: +90-212-440-0000

## Contents

|                                                                             |      |
|-----------------------------------------------------------------------------|------|
| $^1\text{H}$ and $^{13}\text{C}$ spectra of the PQ analogs ( <b>PQ1-4</b> ) | S3-6 |
| HRMS spectra of the PQ analogs ( <b>PQ1-4</b> )                             | S7   |

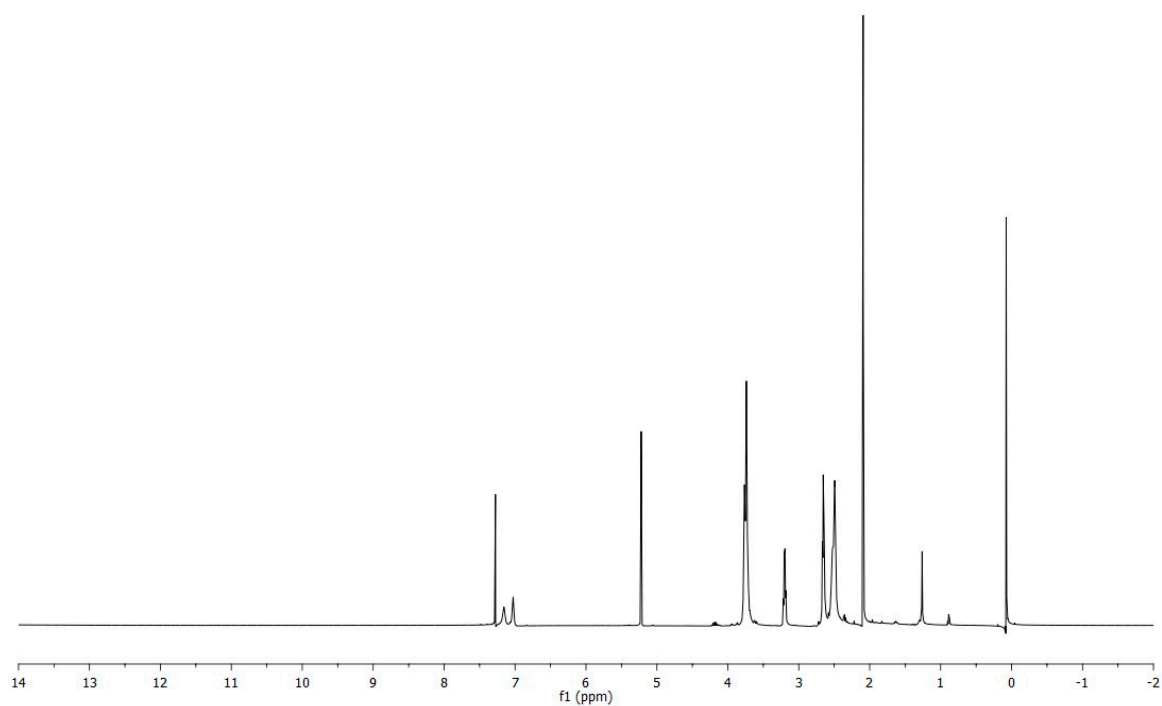

**Figure S1:**  $^1\text{H}$  NMR (500 MHz) spectrum of the **PQ1** in  $\text{CDCl}_3-d_1$

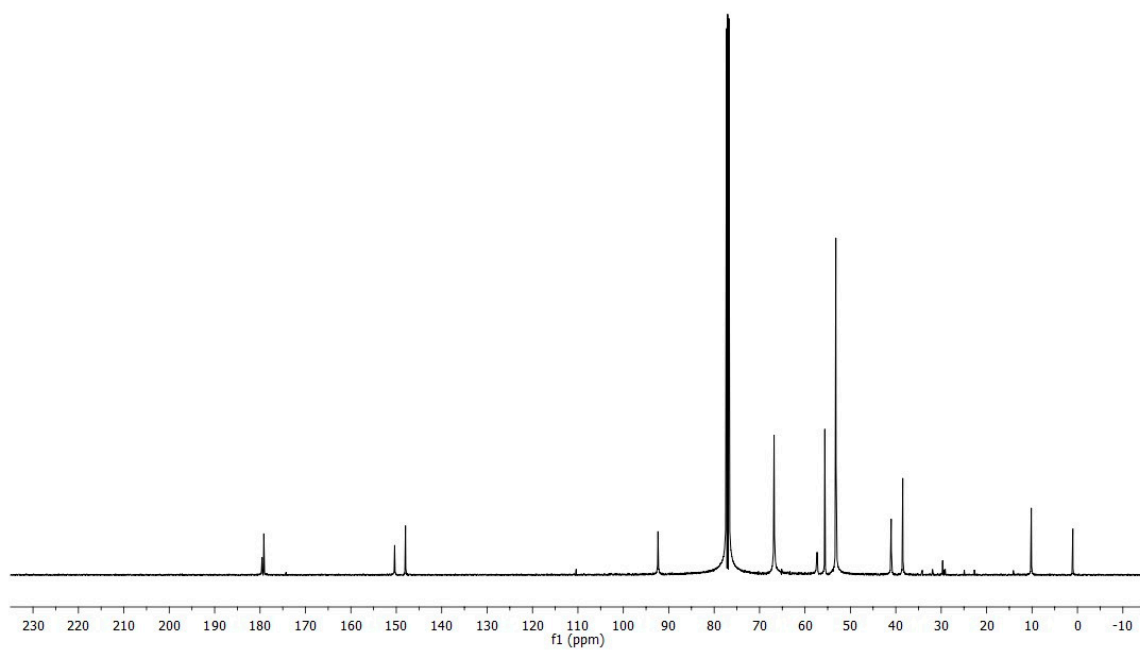

**Figure S2:**  $^{13}\text{C}$  NMR (125 MHz) spectrum of the **PQ1** in  $\text{CDCl}_3-d_1$

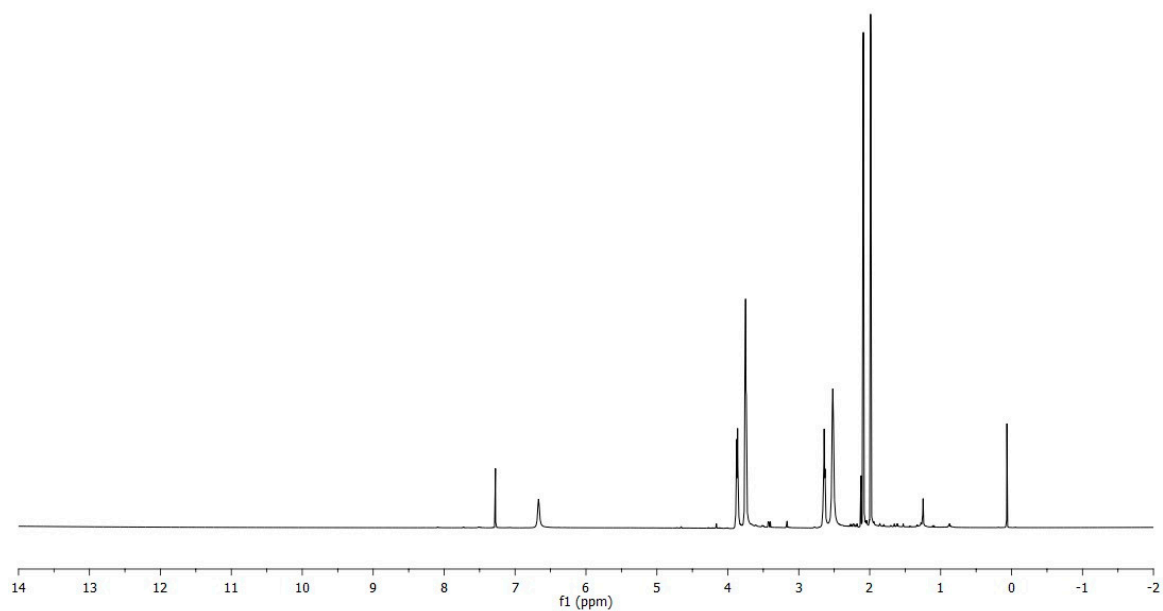

**Figure S3:**  $^1\text{H}$  NMR (500 MHz) spectrum of the **PQ2** in  $\text{CDCl}_3\text{-}d_1$

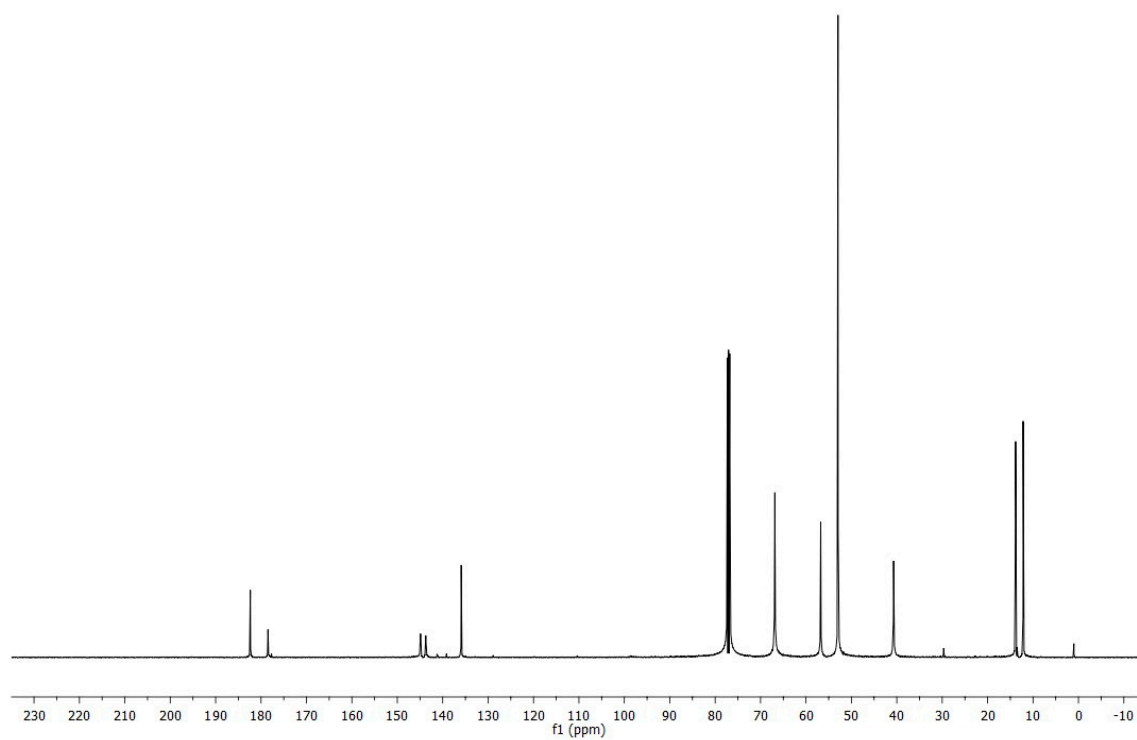

**Figure S4:**  $^{13}\text{C}$  NMR (125 MHz) spectrum of the **PQ2** in  $\text{CDCl}_3\text{-}d_1$

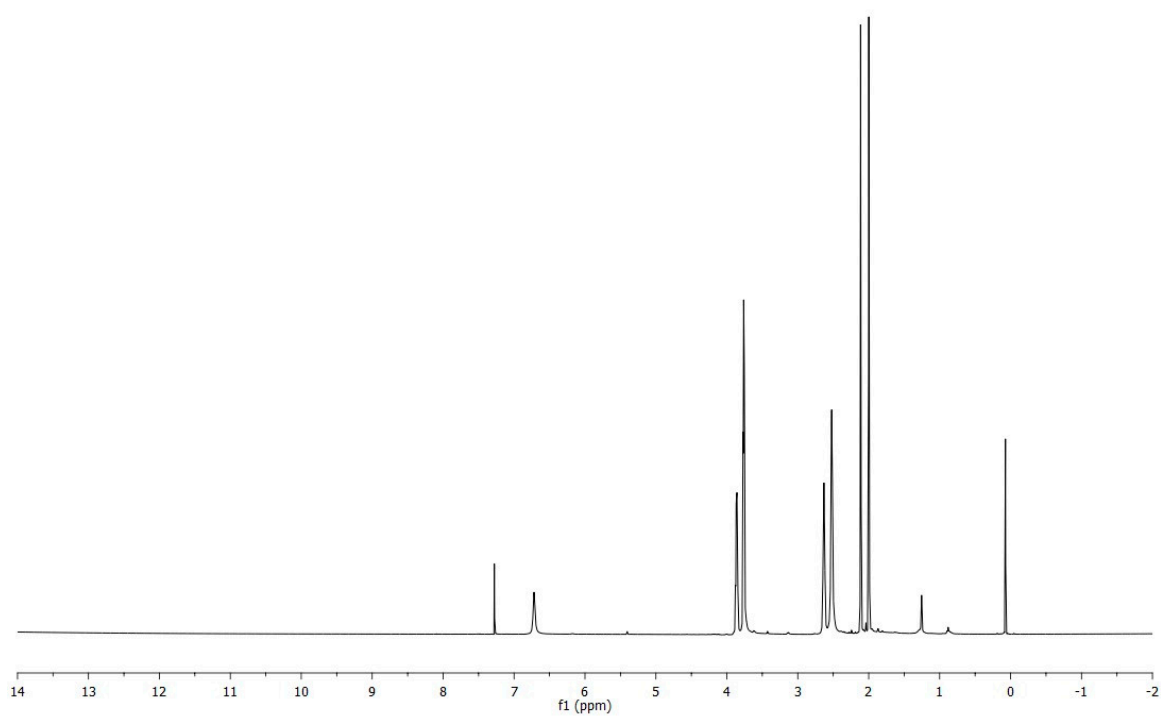

**Figure S5:**  $^1\text{H}$  NMR (500 MHz) spectrum of the **PQ3** in  $\text{CDCl}_3-d_1$

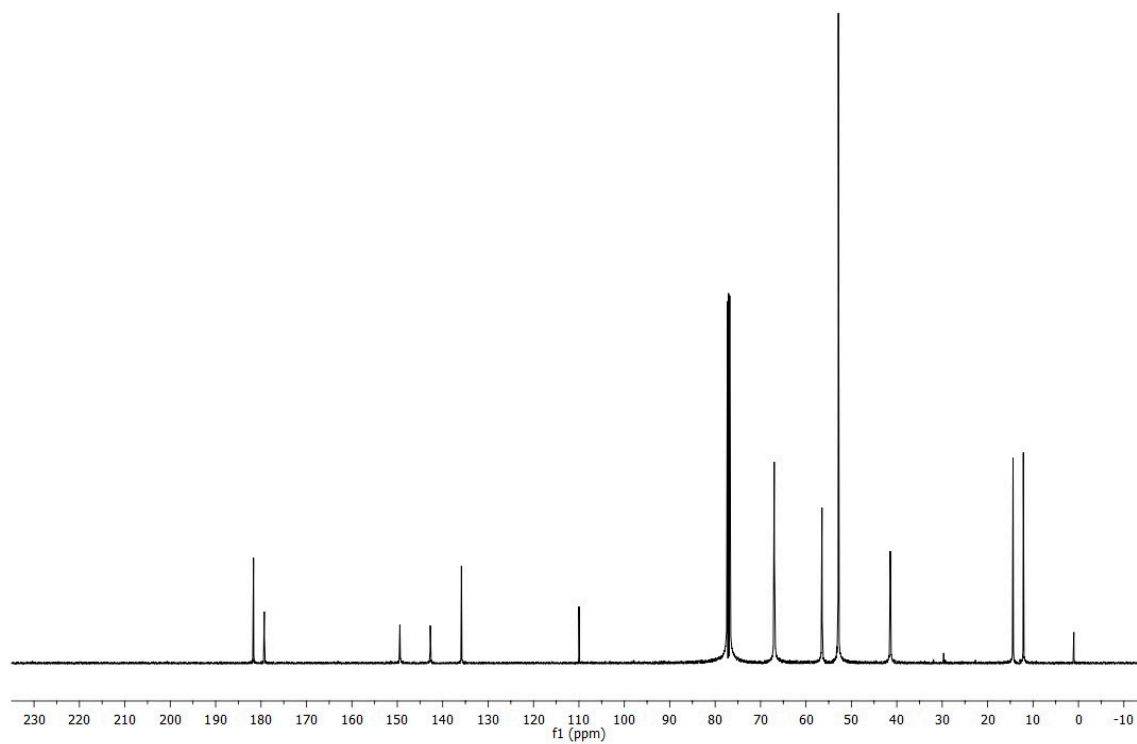

**Figure S6:**  $^{13}\text{C}$  NMR (125 MHz) spectrum of the **PQ3** in  $\text{CDCl}_3-d_1$

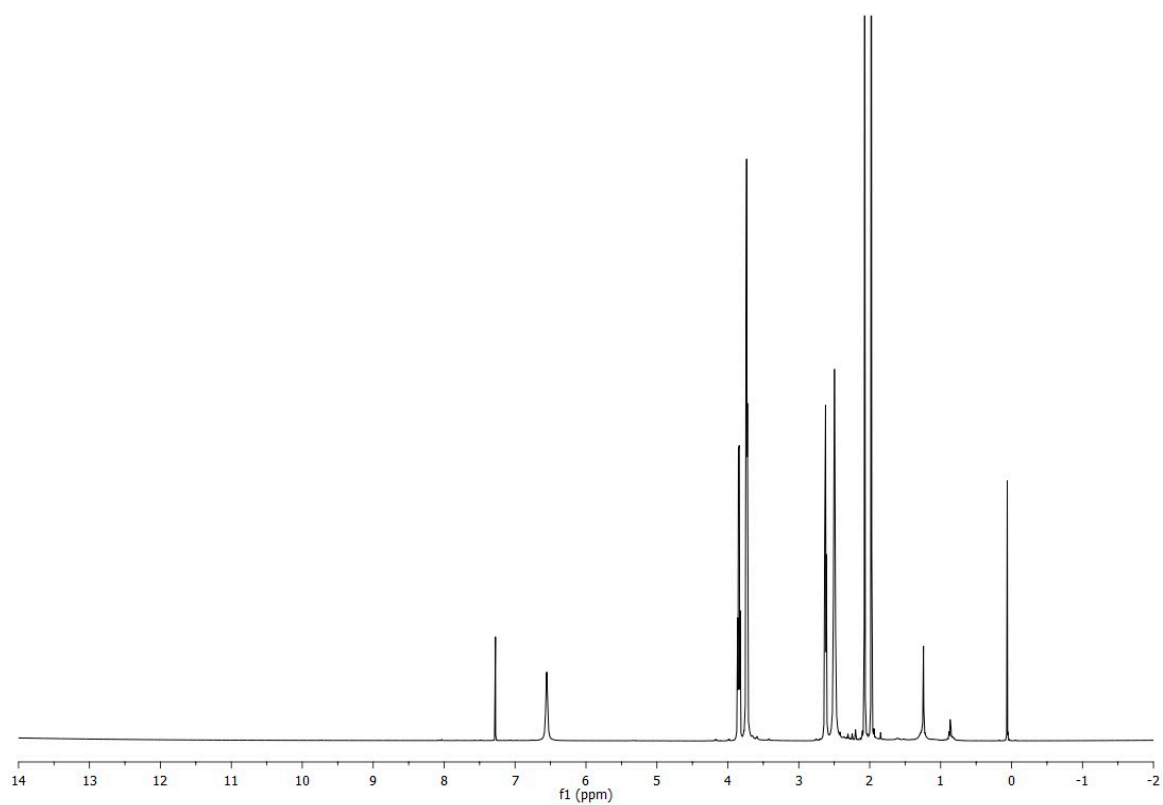

**Figure S7:**  $^1\text{H}$  NMR (500 MHz) spectrum of the **PQ4** in  $\text{CDCl}_3-d_1$

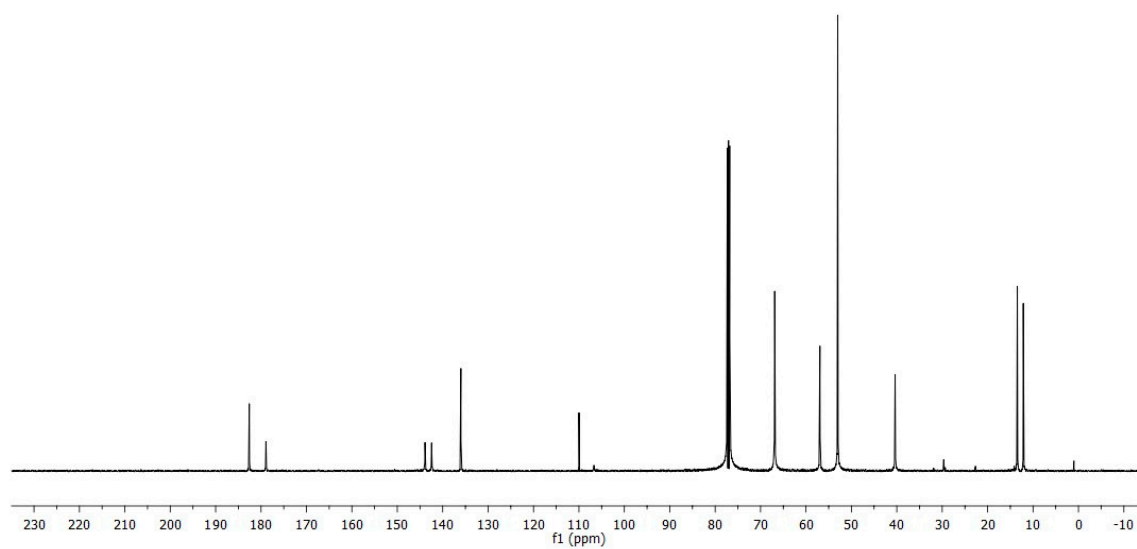

**Figure S8:**  $^{13}\text{C}$  NMR (125 MHz) spectrum of the **PQ4** in  $\text{CDCl}_3-d_1$

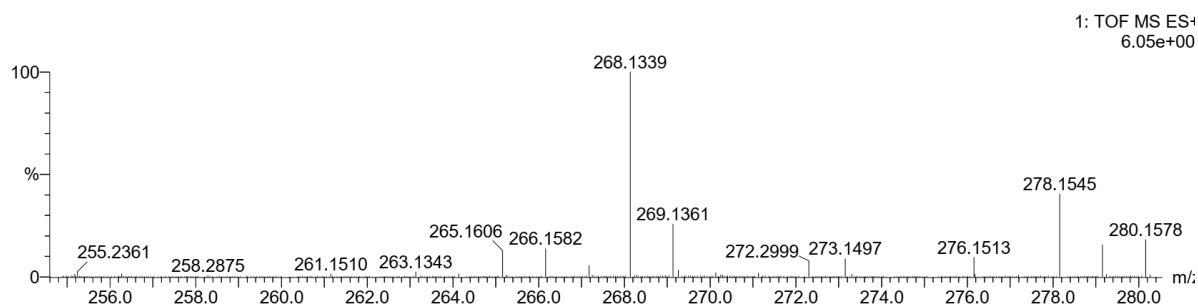

**Figure S9: HRMS spectrum of the PQ1**

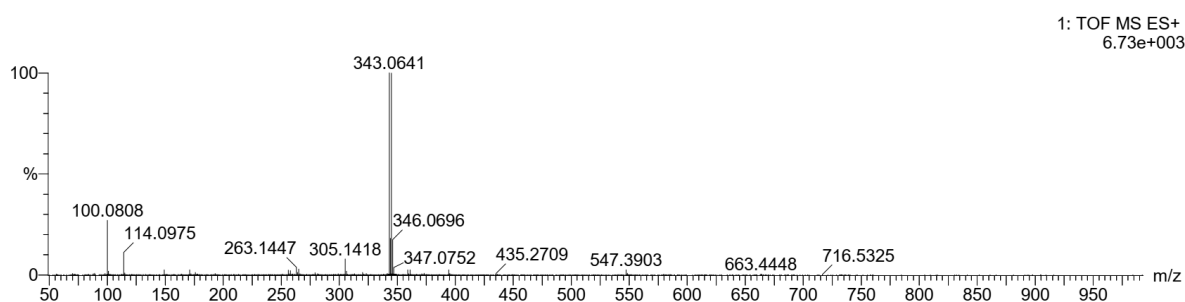

**Figure S10: HRMS spectrum of the PQ2**

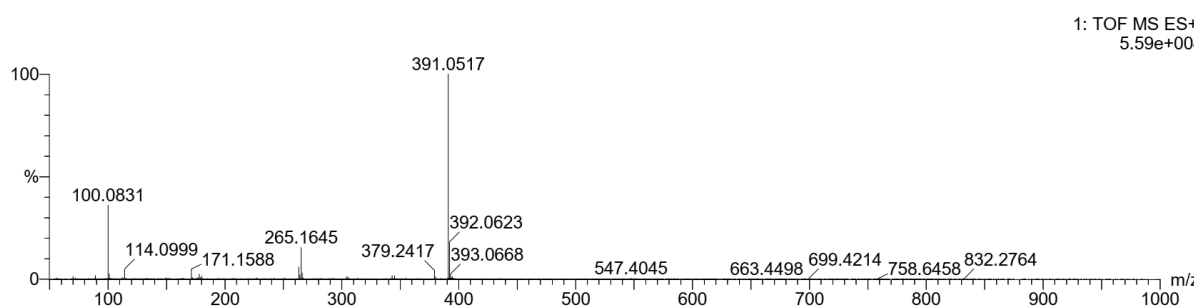

**Figure S11: HRMS spectrum of the PQ3**

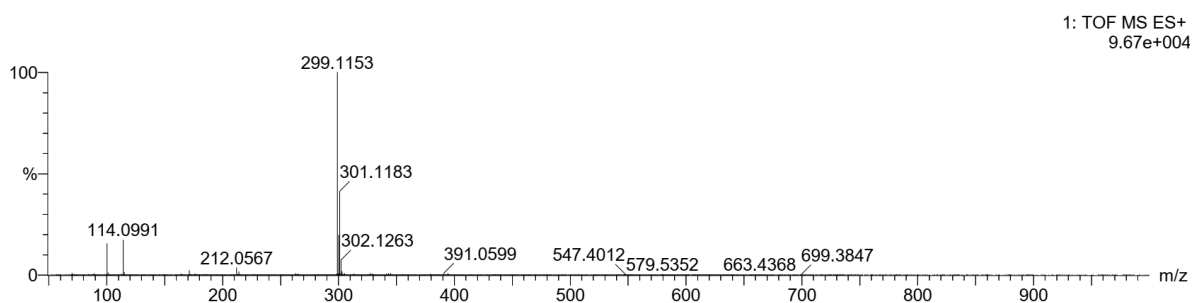

**Figure S12: HRMS spectrum of the PQ4**
